# Supplementary material for: Facile synthesis of electrocatalytically active NbS2 nanoflakes for an enhanced hydrogen evolution reaction (HER)
Source: Royal Society of Chemistry journal article supplement (doi:10.1039/c7se00376e), 2017-11-06
Supplement: c7se00376e1.pdf [file c7se00376e1.pdf]

## *Electronic Supplementary Information*

### **Facile synthesis of electrocatalytically active NbS<sub>2</sub> nanoflakes for enhanced hydrogen evolution reaction (HER)**

Deepesh Gopalakrishnan, Andrew Lee, Naresh Kumar Thangavel and Leela Mohana Reddy Arava\*

Department of Mechanical Engineering, Wayne State University, Detroit, Michigan 48202, United States

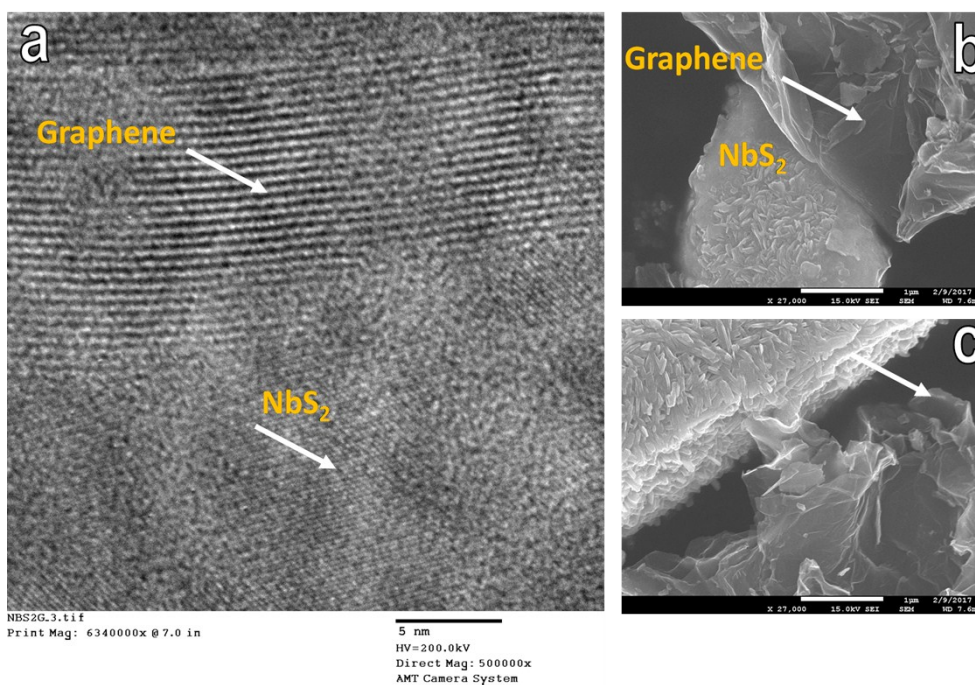

Figure S1. a) TEM image of NbS<sub>2</sub>/rGO composite. b) SEM images of NbS<sub>2</sub>/rGO composite

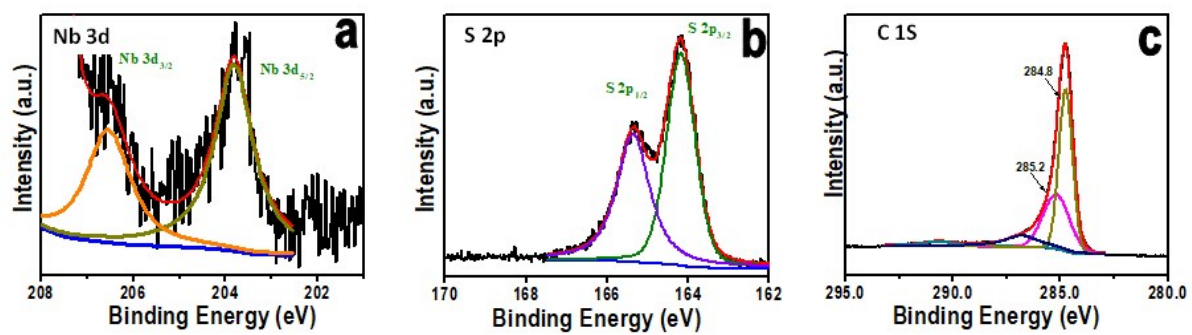

Figure S2. XPS of NbS<sub>2</sub>/rGO composite towards HER

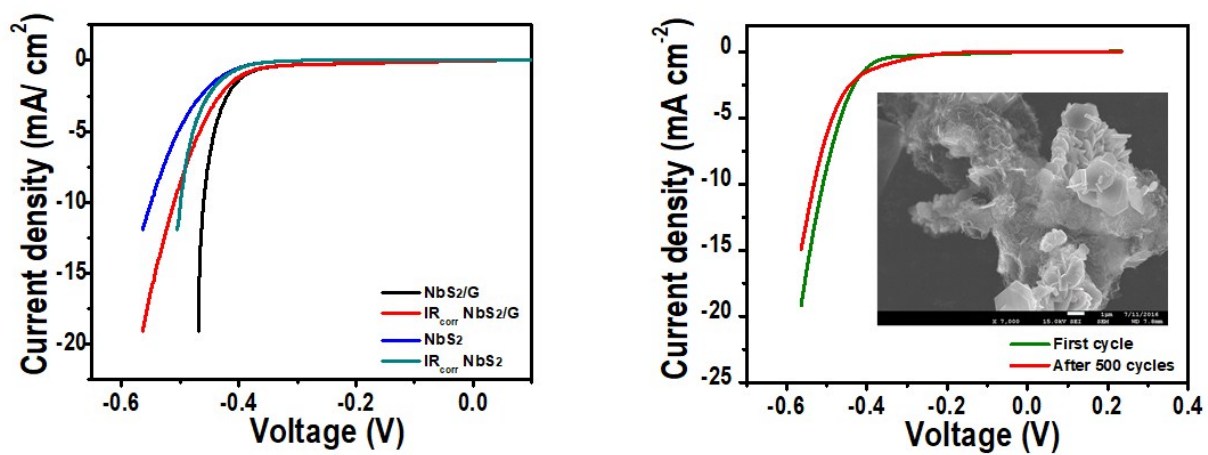

Figure S3. a. Comparison of LSVs of NbS<sub>2</sub> and NbS<sub>2</sub>/G with and without IR correction. b. stability of NbS<sub>2</sub>/G composite towards HER (inset : SEM image of NbS<sub>2</sub>/G after 500 cycles)

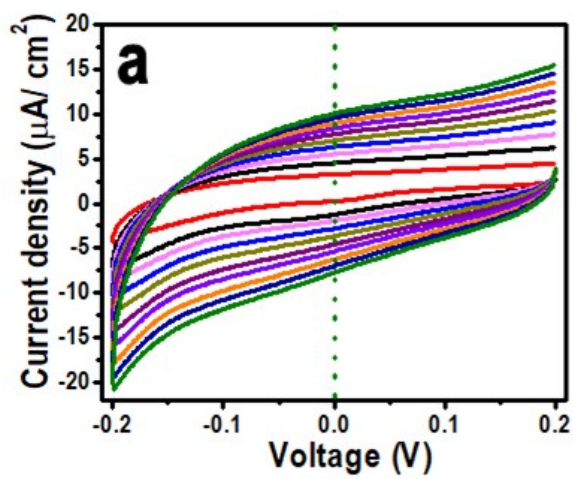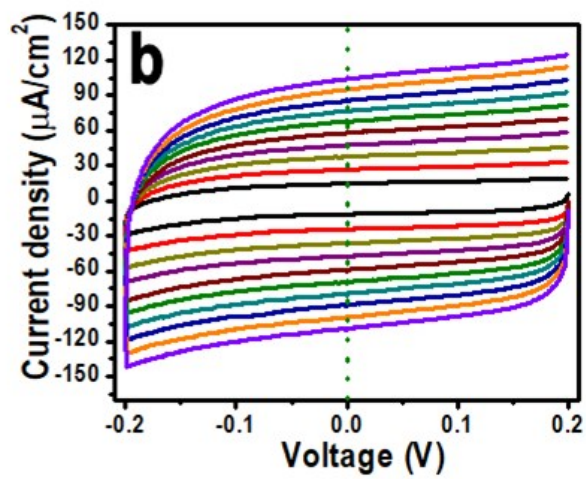

Figure S4. Electrochemical cyclic voltammogram of a) NbS<sub>2</sub> nanoflakes and b) NbS<sub>2</sub>/G at different potential scanning rates.
